# Supplementary material for: Semi-Supervised Multi-View Learning for Gene Network Reconstruction
Source: PubMed Central journal article supplement (PMC4671612; doi:10.1371/journal.pone.0144031), 2015-12-07
Supplement: pone.0144031.s002.pdf [file pone.0144031.s002.pdf]

## Results with PCA clustering

| Measures                                                                                                                                    | Scoring Schemes |     |            |     |    |       |
|---------------------------------------------------------------------------------------------------------------------------------------------|-----------------|-----|------------|-----|----|-------|
|                                                                                                                                             | ARACNE          | AWE | AWE w/o TF | CLR | ID | MRNET |
| Dynamic Time Warping (Asymmetric constraint path)                                                                                           | 2               | 2   | 2          | 2   | 2  | 2     |
| Dynamic Time Warping (Symmetric constraint path 1)                                                                                          | 2               | 2   | 2          | 2   | 2  | 2     |
| Dynamic Time Warping (Symmetric constraint path 2)                                                                                          | 2               | 2   | 2          | 2   | 2  | 2     |
| Euclidian distance                                                                                                                          | 2               | 2   | 2          | 2   | 2  | 2     |
| L10Norm distance                                                                                                                            | 2               | 2   | 2          | 2   | 2  | 2     |
| Manhattan distance                                                                                                                          | 2               | 2   | 2          | 2   | 2  | 2     |
| Kendall correlation coefficient                                                                                                             | 1               | 3   | 3          | 3   | 1  | 3     |
| MI - Equal Frequency discretization through optimized maximum likelihood                                                                    | 1               | 1   | 1          | 3   | 1  | 3     |
| MI - Equal Frequency discretization through optimized maximum likelihood over coarse-grained variables (Kolmogorov-Sinai entropy)           |                 |     |            | 3   |    | 3     |
| MI - Equal Frequency discretization through shrinkage                                                                                       | 1               | 1   | 1          | 1   | 1  | 3     |
| MI - Equal Frequency discretization through shrinkage over coarse-grained variables (Kolmogorov-Sinai entropy)                              |                 |     |            |     |    | 3     |
| MI - Equal Width discretization through optimized maximum likelihood                                                                        | 1               | 1   | 1          | 1   | 1  | 1     |
| MI - Equal Width discretization through optimized maximum likelihood over coarse-grained variables (Kolmogorov-Sinai entropy)               | 2               | 3   | 3          | 2   | 3  | 2     |
| MI - Equal Width discretization through shrinkage                                                                                           | 1               | 1   | 1          | 1   | 1  | 1     |
| MI - Equal Width discretization through shrinkage over coarse-grained variables (Kolmogorov-Sinai entropy)                                  |                 |     |            |     |    | 3     |
| Pearson correlation coefficient                                                                                                             | 3               | 1   | 1          | 3   | 1  | 1     |
| Spearman correlation coefficient                                                                                                            | 1               | 3   | 3          | 3   | 1  | 3     |
| Mean between symbolic sequence similarity and MI on symbol vectors with Equal Frequency discretization through optimized maximum likelihood | 1               | 1   | 1          | 1   | 1  | 3     |
| Mean between symbolic sequence similarity and MI on symbol vectors with Equal Width discretization through optimized maximum likelihood     | 1               | 1   | 1          | 1   | 1  | 3     |
| MI on symbol vectors with Equal Frequency discretization through optimized maximum likelihood                                               | 1               | 1   | 1          | 1   | 1  | 3     |
| MI on symbol vectors with Equal Width discretization through optimized maximum likelihood                                                   | 3               | 3   | 3          | 1   | 3  | 3     |
| Qualitative distance measure                                                                                                                | 3               | 3   | 3          | 3   | 3  | 3     |
| Symbol sequence similarity                                                                                                                  | 1               | 3   | 3          | 3   | 1  | 3     |

Figure 1: Clustering (PCA) of base methods into 3 views (clusters) for the SynTReN *E. coli* dataset with 100 nodes and noise level 0.0. Each base method is a combination of a distance measure and a scoring scheme (cf. Supplementary File 1). The number (and the corresponding color) in a cell identifies the cluster to which a base method is assigned. Empty cells indicate that the corresponding base method has not been associated with any cluster. This can happen if the base method returns no interactions.

| Measures                                                                                                                                    | Scoring Schemes |     |            |     |    |       |
|---------------------------------------------------------------------------------------------------------------------------------------------|-----------------|-----|------------|-----|----|-------|
|                                                                                                                                             | ARACNE          | AWE | AWE w/o TF | CLR | ID | MRNET |
| Dynamic Time Warping (Asymmetric constraint path)                                                                                           | 2               | 2   | 2          | 2   | 2  | 2     |
| Dynamic Time Warping (Symmetric constraint path 1)                                                                                          | 2               | 2   | 2          | 2   | 2  | 2     |
| Dynamic Time Warping (Symmetric constraint path 2)                                                                                          | 2               | 2   | 2          | 2   | 2  | 2     |
| Euclidian distance                                                                                                                          | 2               | 2   | 2          | 2   | 2  | 2     |
| L10Norm distance                                                                                                                            | 2               | 2   | 2          | 2   | 2  | 2     |
| Manhattan distance                                                                                                                          | 2               | 2   | 2          | 2   | 2  | 2     |
| Kendall correlation coefficient                                                                                                             | 1               | 3   | 3          | 3   | 1  | 4     |
| MI - Equal Frequency discretization through optimized maximum likelihood                                                                    | 1               | 1   | 1          | 3   | 1  | 3     |
| MI - Equal Frequency discretization through optimized maximum likelihood over coarse-grained variables (Kolmogorov-Sinai entropy)           |                 |     |            | 3   |    | 4     |
| MI - Equal Frequency discretization through shrinkage                                                                                       | 1               | 1   | 1          | 1   | 1  | 3     |
| MI - Equal Frequency discretization through shrinkage over coarse-grained variables (Kolmogorov-Sinai entropy)                              |                 |     |            |     |    | 4     |
| MI - Equal Width discretization through optimized maximum likelihood                                                                        | 4               | 4   | 4          | 4   | 4  | 4     |
| MI - Equal Width discretization through optimized maximum likelihood over coarse-grained variables (Kolmogorov-Sinai entropy)               | 4               | 3   | 3          | 4   | 3  | 4     |
| MI - Equal Width discretization through shrinkage                                                                                           | 4               | 4   | 4          | 4   | 4  | 4     |
| MI - Equal Width discretization through shrinkage over coarse-grained variables (Kolmogorov-Sinai entropy)                                  |                 |     |            |     |    | 4     |
| Pearson correlation coefficient                                                                                                             | 3               | 1   | 1          | 1   | 1  | 3     |
| Spearman correlation coefficient                                                                                                            | 1               | 3   | 3          | 3   | 1  | 4     |
| Mean between symbolic sequence similarity and MI on symbol vectors with Equal Frequency discretization through optimized maximum likelihood | 1               | 1   | 1          | 1   | 1  | 4     |
| Mean between symbolic sequence similarity and MI on symbol vectors with Equal Width discretization through optimized maximum likelihood     | 1               | 1   | 1          | 1   | 1  | 4     |
| MI on symbol vectors with Equal Frequency discretization through optimized maximum likelihood                                               | 1               | 1   | 1          | 1   | 1  | 4     |
| MI on symbol vectors with Equal Width discretization through optimized maximum likelihood                                                   | 3               | 3   | 3          | 4   | 3  | 4     |
| Qualitative distance measure                                                                                                                | 3               | 4   | 4          | 3   | 4  | 4     |
| Symbol sequence similarity                                                                                                                  | 1               | 3   | 3          | 3   | 1  | 3     |

Figure 2: Clustering (PCA) of base methods into 4 views (clusters) for the SynTREn *E. coli* dataset with 100 nodes and noise level 0.0. Each base method is a combination of a distance measure and a scoring scheme (cf. Supplementary File 1). The number (and the corresponding color) in a cell identifies the cluster to which a base method is assigned. Empty cells indicate that the corresponding base method has not been associated with any cluster. This can happen if the base method returns no interactions.

| Measures                                                                                                                                    | Scoring Schemes |     |            |     |    |       |
|---------------------------------------------------------------------------------------------------------------------------------------------|-----------------|-----|------------|-----|----|-------|
|                                                                                                                                             | ARACNE          | AWE | AWE w/o TF | CLR | ID | MRNET |
| Dynamic Time Warping (Asymmetric constraint path)                                                                                           | 2               | 2   | 2          | 2   | 2  | 2     |
| Dynamic Time Warping (Symmetric constraint path 1)                                                                                          | 2               | 2   | 2          | 2   | 2  | 2     |
| Dynamic Time Warping (Symmetric constraint path 2)                                                                                          | 2               | 2   | 2          | 2   | 2  | 2     |
| Euclidian distance                                                                                                                          | 2               | 2   | 2          | 2   | 2  | 2     |
| Kendall correlation coefficient                                                                                                             | 1               | 5   | 5          | 5   | 1  | 3     |
| L10Norm distance                                                                                                                            | 2               | 1   | 1          | 2   | 1  | 2     |
| Manhattan distance                                                                                                                          | 2               | 2   | 2          | 2   | 2  | 2     |
| Mean between symbolic sequence similarity and MI on symbol vectors with Equal Frequency discretization through optimized maximum likelihood | 1               | 1   | 1          | 5   | 1  | 3     |
| Mean between symbolic sequence similarity and MI on symbol vectors with Equal Width discretization through optimized maximum likelihood     | 4               | 1   | 1          | 5   | 1  | 3     |
| MI - Equal Frequency discretization through optimized maximum likelihood                                                                    | 1               | 1   | 1          | 5   | 1  | 3     |
| MI - Equal Frequency discretization through optimized maximum likelihood over coarse-grained variables (Kolmogorov-Sinai entropy)           |                 |     |            | 5   |    | 3     |
| MI - Equal Frequency discretization through shrinkage                                                                                       | 1               | 1   | 1          | 5   | 1  | 3     |
| MI - Equal Frequency discretization through shrinkage over coarse-grained variables (Kolmogorov-Sinai entropy)                              |                 |     |            |     |    | 3     |
| MI - Equal Width discretization through optimized maximum likelihood                                                                        | 5               | 4   | 4          | 4   | 4  | 5     |
| MI - Equal Width discretization through optimized maximum likelihood over coarse-grained variables (Kolmogorov-Sinai entropy)               | 2               | 4   | 4          | 4   | 4  | 2     |
| MI - Equal Width discretization through shrinkage                                                                                           | 4               | 4   | 4          | 4   | 4  | 5     |
| MI - Equal Width discretization through shrinkage over coarse-grained variables (Kolmogorov-Sinai entropy)                                  |                 |     |            |     |    | 3     |
| MI on symbol vectors with Equal Frequency discretization through optimized maximum likelihood                                               | 1               | 1   | 1          | 5   | 1  | 3     |
| MI on symbol vectors with Equal Width discretization through optimized maximum likelihood                                                   | 4               | 1   | 1          | 5   | 4  | 3     |
| Pearson correlation coefficient                                                                                                             | 4               | 4   | 4          | 4   | 1  | 4     |
| Qualitative distance measure                                                                                                                | 4               | 4   | 4          | 4   | 4  | 3     |
| Spearman correlation coefficient                                                                                                            | 1               | 5   | 5          | 5   | 1  | 3     |
| Symbol sequence similarity                                                                                                                  | 4               | 5   | 5          | 5   | 1  | 3     |

Figure 3: Clustering (PCA) of base methods into 5 views (clusters) for the SynTReN *E. coli* dataset with 100 nodes and noise level 0.0. Each base method is a combination of a distance measure and a scoring scheme (cf. Supplementary File 1). The number (and the corresponding color) in a cell identifies the cluster to which a base method is assigned. Empty cells indicate that the corresponding base method has not been associated with any cluster. This can happen if the base method returns no interactions.

| Measures                                                                                                                                    | Scoring Schemes |     |            |     |    |       |
|---------------------------------------------------------------------------------------------------------------------------------------------|-----------------|-----|------------|-----|----|-------|
|                                                                                                                                             | ARACNE          | AWE | AWE w/o TF | CLR | ID | MRNET |
| Dynamic Time Warping (Asymmetric constraint path)                                                                                           | 2               | 2   | 2          | 2   | 2  | 2     |
| Dynamic Time Warping (Symmetric constraint path 1)                                                                                          | 2               | 2   | 2          | 2   | 2  | 2     |
| Dynamic Time Warping (Symmetric constraint path 2)                                                                                          | 2               | 2   | 2          | 2   | 2  | 2     |
| Euclidian distance                                                                                                                          | 2               | 2   | 2          | 2   | 2  | 2     |
| L10Norm distance                                                                                                                            | 2               | 1   | 1          | 2   | 2  | 2     |
| Manhattan distance                                                                                                                          | 2               | 2   | 2          | 2   | 2  | 2     |
| Kendall correlation coefficient                                                                                                             | 1               | 3   | 3          | 3   | 1  | 3     |
| MI - Equal Frequency discretization through optimized maximum likelihood                                                                    | 1               | 1   | 1          | 1   | 1  | 3     |
| MI - Equal Frequency discretization through optimized maximum likelihood over coarse-grained variables (Kolmogorov-Sinai entropy)           |                 |     |            | 3   |    | 3     |
| MI - Equal Frequency discretization through shrinkage                                                                                       | 1               | 1   | 1          | 1   | 1  | 3     |
| MI - Equal Frequency discretization through shrinkage over coarse-grained variables (Kolmogorov-Sinai entropy)                              |                 |     |            |     |    | 3     |
| MI - Equal Width discretization through optimized maximum likelihood                                                                        | 3               | 1   | 1          | 1   | 3  | 1     |
| MI - Equal Width discretization through optimized maximum likelihood over coarse-grained variables (Kolmogorov-Sinai entropy)               | 2               | 2   | 2          | 3   | 2  | 2     |
| MI - Equal Width discretization through shrinkage                                                                                           | 3               | 1   | 1          | 1   | 3  | 1     |
| MI - Equal Width discretization through shrinkage over coarse-grained variables (Kolmogorov-Sinai entropy)                                  |                 |     |            |     |    | 3     |
| Pearson correlation coefficient                                                                                                             | 1               | 1   | 1          | 3   | 1  | 1     |
| Spearman correlation coefficient                                                                                                            | 1               | 3   | 3          | 3   | 1  | 3     |
| Mean between symbolic sequence similarity and MI on symbol vectors with Equal Frequency discretization through optimized maximum likelihood | 1               | 1   | 1          | 3   | 1  | 3     |
| Mean between symbolic sequence similarity and MI on symbol vectors with Equal Width discretization through optimized maximum likelihood     | 1               | 1   | 1          | 3   | 1  | 3     |
| MI on symbol vectors with Equal Frequency discretization through optimized maximum likelihood                                               | 1               | 1   | 1          | 3   | 1  | 3     |
| MI on symbol vectors with Equal Width discretization through optimized maximum likelihood                                                   | 1               | 1   | 1          | 1   | 1  | 3     |
| Qualitative distance measure                                                                                                                | 1               | 3   | 3          | 1   | 3  | 3     |
| Symbol sequence similarity                                                                                                                  | 1               | 3   | 3          | 3   | 1  | 3     |

Figure 4: Clustering (PCA) of base methods into 3 views (clusters) for the SynTReN *Yeast* dataset with 100 nodes and noise level 0.0. Each base method is a combination of a distance measure and a scoring scheme (cf. Supplementary File 1). The number (and the corresponding color) in a cell identifies the cluster to which a base method is assigned. Empty cells indicate that the corresponding base method has not been associated with any cluster. This can happen if the base method returns no interactions.

| Measures                                                                                                                                    | Scoring Schemes |     |            |     |    |       |
|---------------------------------------------------------------------------------------------------------------------------------------------|-----------------|-----|------------|-----|----|-------|
|                                                                                                                                             | ARACNE          | AWE | AWE w/o TF | CLR | ID | MRNET |
| Dynamic Time Warping (Asymmetric constraint path)                                                                                           | 2               | 2   | 2          | 2   | 2  | 2     |
| Dynamic Time Warping (Symmetric constraint path 1)                                                                                          | 2               | 2   | 2          | 2   | 2  | 2     |
| Dynamic Time Warping (Symmetric constraint path 2)                                                                                          | 2               | 2   | 2          | 2   | 2  | 2     |
| Euclidian distance                                                                                                                          | 2               | 2   | 2          | 2   | 2  | 2     |
| L10Norm distance                                                                                                                            | 2               | 2   | 2          | 2   | 2  | 2     |
| Manhattan distance                                                                                                                          | 2               | 2   | 2          | 2   | 2  | 2     |
| Kendall correlation coefficient                                                                                                             | 1               | 3   | 3          | 3   | 1  | 4     |
| MI - Equal Frequency discretization through optimized maximum likelihood                                                                    | 1               | 1   | 1          | 3   | 1  | 3     |
| MI - Equal Frequency discretization through optimized maximum likelihood over coarse-grained variables (Kolmogorov-Sinai entropy)           |                 |     |            | 3   |    | 4     |
| MI - Equal Frequency discretization through shrinkage                                                                                       | 1               | 1   | 1          | 1   | 1  | 3     |
| MI - Equal Frequency discretization through shrinkage over coarse-grained variables (Kolmogorov-Sinai entropy)                              |                 |     |            |     |    | 4     |
| MI - Equal Width discretization through optimized maximum likelihood                                                                        | 4               | 4   | 4          | 4   | 4  | 4     |
| MI - Equal Width discretization through optimized maximum likelihood over coarse-grained variables (Kolmogorov-Sinai entropy)               | 4               | 3   | 3          | 4   | 3  | 4     |
| MI - Equal Width discretization through shrinkage                                                                                           | 4               | 4   | 4          | 4   | 4  | 4     |
| MI - Equal Width discretization through shrinkage over coarse-grained variables (Kolmogorov-Sinai entropy)                                  |                 |     |            |     |    | 4     |
| Pearson correlation coefficient                                                                                                             | 3               | 1   | 1          | 1   | 1  | 3     |
| Spearman correlation coefficient                                                                                                            | 1               | 3   | 3          | 3   | 1  | 4     |
| Mean between symbolic sequence similarity and MI on symbol vectors with Equal Frequency discretization through optimized maximum likelihood | 1               | 1   | 1          | 1   | 1  | 4     |
| Mean between symbolic sequence similarity and MI on symbol vectors with Equal Width discretization through optimized maximum likelihood     | 1               | 1   | 1          | 1   | 1  | 4     |
| MI on symbol vectors with Equal Frequency discretization through optimized maximum likelihood                                               | 1               | 1   | 1          | 1   | 1  | 4     |
| MI on symbol vectors with Equal Width discretization through optimized maximum likelihood                                                   | 3               | 3   | 3          | 4   | 3  | 4     |
| Qualitative distance measure                                                                                                                | 3               | 4   | 4          | 3   | 4  | 4     |
| Symbol sequence similarity                                                                                                                  | 1               | 3   | 3          | 3   | 1  | 3     |

Figure 5: Clustering (PCA) of base methods into 4 views (clusters) for the SynTReN *Yeast* dataset with 100 nodes and noise level 0.0. Each base method is a combination of a distance measure and a scoring scheme (cf. Supplementary File 1). The number (and the corresponding color) in a cell identifies the cluster to which a base method is assigned. Empty cells indicate that the corresponding base method has not been associated with any cluster. This can happen if the base method returns no interactions.

| Measures                                                                                                                                    | Scoring Schemes |     |            |     |    |       |
|---------------------------------------------------------------------------------------------------------------------------------------------|-----------------|-----|------------|-----|----|-------|
|                                                                                                                                             | ARACNE          | AWE | AWE w/o TF | CLR | ID | MRNET |
| Dynamic Time Warping (Asymmetric constraint path)                                                                                           | 2               | 2   | 2          | 2   | 2  | 2     |
| Dynamic Time Warping (Symmetric constraint path 1)                                                                                          | 2               | 2   | 2          | 2   | 2  | 2     |
| Dynamic Time Warping (Symmetric constraint path 2)                                                                                          | 2               | 2   | 2          | 2   | 2  | 2     |
| Euclidian distance                                                                                                                          | 2               | 5   | 5          | 2   | 2  | 2     |
| Kendall correlation coefficient                                                                                                             | 1               | 4   | 4          | 4   | 1  | 3     |
| L10Norm distance                                                                                                                            | 2               | 5   | 5          | 2   | 1  | 2     |
| Manhattan distance                                                                                                                          | 2               | 2   | 2          | 2   | 2  | 2     |
| Mean between symbolic sequence similarity and MI on symbol vectors with Equal Frequency discretization through optimized maximum likelihood | 4               | 1   | 1          | 4   | 1  | 3     |
| Mean between symbolic sequence similarity and MI on symbol vectors with Equal Width discretization through optimized maximum likelihood     | 4               | 1   | 1          | 4   | 4  | 3     |
| MI - Equal Frequency discretization through optimized maximum likelihood                                                                    | 5               | 5   | 5          | 4   | 5  | 3     |
| MI - Equal Frequency discretization through optimized maximum likelihood over coarse-grained variables (Kolmogorov-Sinai entropy)           |                 |     |            | 2   |    | 4     |
| MI - Equal Frequency discretization through shrinkage                                                                                       | 5               | 5   | 5          | 4   | 5  | 3     |
| MI - Equal Frequency discretization through shrinkage over coarse-grained variables (Kolmogorov-Sinai entropy)                              |                 |     |            |     |    | 4     |
| MI - Equal Width discretization through optimized maximum likelihood                                                                        | 3               | 3   | 3          | 3   | 3  | 5     |
| MI - Equal Width discretization through optimized maximum likelihood over coarse-grained variables (Kolmogorov-Sinai entropy)               | 5               | 2   | 2          | 4   | 2  | 5     |
| MI - Equal Width discretization through shrinkage                                                                                           | 3               | 3   | 3          | 3   | 3  | 5     |
| MI - Equal Width discretization through shrinkage over coarse-grained variables (Kolmogorov-Sinai entropy)                                  |                 |     |            |     |    | 4     |
| MI on symbol vectors with Equal Frequency discretization through optimized maximum likelihood                                               | 4               | 1   | 1          | 4   | 4  | 3     |
| MI on symbol vectors with Equal Width discretization through optimized maximum likelihood                                                   | 4               | 1   | 1          | 1   | 4  | 3     |
| Pearson correlation coefficient                                                                                                             | 3               | 3   | 3          | 4   | 1  | 3     |
| Qualitative distance measure                                                                                                                | 4               | 5   | 5          | 4   | 5  | 3     |
| Spearman correlation coefficient                                                                                                            | 1               | 4   | 4          | 4   | 1  | 3     |
| Symbol sequence similarity                                                                                                                  | 5               | 4   | 4          | 4   | 5  | 3     |

Figure 6: Clustering (PCA) of base methods into 5 views (clusters) for the SynTReN *Yeast* dataset with 100 nodes and noise level 0.0. Each base method is a combination of a distance measure and a scoring scheme (cf. Supplementary File 1). The number (and the corresponding color) in a cell identifies the cluster to which a base method is assigned. Empty cells indicate that the corresponding base method has not been associated with any cluster. This can happen if the base method returns no interactions.

| <i>D5InSilico - 3 Views</i> |   | <i>D5InSilico - 4 Views</i> |   | <i>D5InSilico - 5 Views</i> |   | <i>D5EColi - 3 Views</i> |   | <i>D5EColi - 4 Views</i> |   | <i>D5EColi - 5 Views</i> |   | <i>D5Yeast - 3 Views</i> |   | <i>D5Yeast - 4 Views</i> |   | <i>D5Yeast - 5 Views</i> |   |
|-----------------------------|---|-----------------------------|---|-----------------------------|---|--------------------------|---|--------------------------|---|--------------------------|---|--------------------------|---|--------------------------|---|--------------------------|---|
| Methods                     |   | Methods                     |   | Methods                     |   | Methods                  |   | Methods                  |   | Methods                  |   | Methods                  |   | Methods                  |   | Methods                  |   |
| Regression1                 | 1 | Correlation1                | 1 | Meta2                       | 1 | Correlation1             | 1 | Regression1              | 1 | Other3                   | 1 | Bayesian3                | 1 | Bayesian3                | 1 | MutualInformation5       | 1 |
| Regression5                 | 1 | Meta2                       | 1 | Correlation1                | 1 | Correlation2             | 1 | Other1                   | 1 | Correlation1             | 1 | Bayesian6                | 1 | Correlation1             | 1 | Other1                   | 1 |
| Other1                      | 1 | Meta4                       | 1 | Meta4                       | 1 | Correlation3             | 1 | Other3                   | 1 | MutualInformation1       | 1 | Correlation1             | 1 | Correlation2             | 1 | Correlation2             | 1 |
| Other3                      | 1 | MutualInformation1          | 1 | MutualInformation1          | 1 | Meta1                    | 1 | Meta1                    | 1 | Correlation2             | 1 | Correlation2             | 1 | Meta2                    | 1 | Correlation1             | 1 |
| Meta4                       | 1 | MutualInformation3          | 1 | Other4                      | 1 | Meta2                    | 1 | Meta4                    | 1 | Meta2                    | 1 | Meta2                    | 1 | MutualInformation1       | 1 | Other4                   | 1 |
| Regression3                 | 1 | Other1                      | 1 | Regression3                 | 1 | Meta4                    | 1 | MutualInformation1       | 1 | Meta4                    | 1 | Meta4                    | 1 | MutualInformation5       | 1 | MutualInformation1       | 1 |
| Regression6                 | 1 | Other3                      | 1 | Other1                      | 1 | MutualInformation1       | 1 | Correlation1             | 1 | Regression1              | 1 | MutualInformation1       | 1 | Other1                   | 1 | Other3                   | 1 |
| Regression8                 | 1 | Other4                      | 1 | Other3                      | 1 | Other1                   | 1 | Other3                   | 1 | Correlation3             | 1 | Correlation3             | 1 | Other3                   | 1 | Meta2                    | 1 |
| MutualInformation1          | 1 | Regression1                 | 1 | Regression5                 | 1 | Other3                   | 1 | Correlation3             | 1 | Meta1                    | 1 | Other1                   | 1 | Other4                   | 1 | Bayesian3                | 1 |
| MutualInformation3          | 1 | Regression3                 | 1 | Regression1                 | 1 | Regression1              | 1 | Meta2                    | 1 | Other1                   | 1 | Other1                   | 1 | Regression1              | 1 | Regression1              | 1 |
| Correlation1                | 1 | Regression5                 | 1 | Bayesian5                   | 2 | Meta3                    | 2 | Regression5              | 2 | Regression5              | 2 | Other4                   | 1 | Correlation3             | 2 | MutualInformation4       | 2 |
| Other4                      | 1 | Regression6                 | 1 | Bayesian4                   | 2 | MutualInformation2       | 2 | Other6                   | 2 | Regression4              | 2 | Other6                   | 1 | Meta3                    | 2 | Regression4              | 2 |
| Meta2                       | 1 | Regression8                 | 1 | Regression4                 | 2 | MutualInformation3       | 2 | Regression2              | 2 | MutualInformation5       | 2 | Regression1              | 1 | MutualInformation2       | 2 | MutualInformation2       | 2 |
| Meta3                       | 1 | Bayesian4                   | 2 | Other2                      | 2 | MutualInformation4       | 2 | Regression3              | 2 | Regression2              | 2 | Correlation3             | 2 | MutualInformation3       | 2 | Regression3              | 2 |
| Regression2                 | 2 | Bayesian5                   | 2 | Regression2                 | 2 | MutualInformation5       | 2 | Regression4              | 2 | Regression8              | 2 | Meta3                    | 2 | MutualInformation4       | 2 | Regression8              | 2 |
| Regression4                 | 2 | MutualInformation2          | 2 | Other8                      | 3 | Other4                   | 2 | Regression6              | 2 | MutualInformation2       | 2 | MutualInformation2       | 2 | Other8                   | 2 | Regression5              | 2 |
| Regression7                 | 2 | MutualInformation4          | 2 | Other7                      | 3 | Other6                   | 2 | Regression8              | 2 | MutualInformation4       | 2 | MutualInformation3       | 2 | Regression3              | 2 | Regression6              | 2 |
| MutualInformation2          | 2 | Other2                      | 2 | Bayesian1                   | 3 | Other7                   | 2 | MutualInformation2       | 2 | MutualInformation3       | 2 | MutualInformation4       | 2 | Regression4              | 2 | Correlation3             | 2 |
| MutualInformation4          | 2 | Regression2                 | 2 | MutualInformation5          | 3 | Other8                   | 2 | MutualInformation3       | 2 | Regression6              | 2 | Other5                   | 2 | Regression5              | 2 | MutualInformation3       | 2 |
| Bayesian4                   | 2 | Regression4                 | 2 | Bayesian2                   | 3 | Regression2              | 2 | MutualInformation4       | 2 | Other6                   | 2 | Other7                   | 2 | Regression6              | 2 | Bayesian1                | 3 |
| Bayesian5                   | 2 | Bayesian1                   | 3 | Meta5                       | 3 | Regression3              | 2 | MutualInformation5       | 2 | Bayesian4                | 3 | Other8                   | 2 | Regression8              | 2 | Bayesian2                | 3 |
| Other2                      | 2 | Bayesian2                   | 3 | Other6                      | 3 | Regression4              | 2 | Bayesian1                | 3 | Bayesian5                | 3 | Regression3              | 2 | Bayesian1                | 3 | Regression2              | 4 |
| Other5                      | 2 | Bayesian3                   | 3 | Bayesian3                   | 3 | Regression5              | 2 | Bayesian2                | 3 | Bayesian6                | 3 | Regression4              | 2 | Bayesian2                | 3 | Bayesian5                | 4 |
| Other6                      | 3 | Correlation2                | 3 | Meta1                       | 3 | Regression6              | 2 | Bayesian3                | 3 | Regression6              | 3 | Bayesian3                | 2 | Bayesian4                | 4 | Meta1                    | 4 |
| Meta1                       | 3 | Correlation3                | 3 | Bayesian6                   | 4 | Regression8              | 2 | Bayesian4                | 3 | Other4                   | 4 | Regression6              | 2 | Bayesian5                | 4 | Bayesian4                | 4 |
| MutualInformation5          | 3 | Meta1                       | 3 | Meta3                       | 4 | Bayesian1                | 3 | Bayesian5                | 3 | Other2                   | 4 | Regression7              | 2 | Bayesian6                | 4 | Bayesian6                | 4 |
| Correlation2                | 3 | Meta5                       | 3 | Other5                      | 4 | Bayesian2                | 3 | Bayesian6                | 3 | Other5                   | 4 | Regression8              | 2 | Meta1                    | 4 | Other6                   | 4 |
| Correlation3                | 3 | MutualInformation5          | 3 | Regression7                 | 4 | Bayesian3                | 3 | Regression7              | 4 | Regression7              | 4 | Bayesian1                | 3 | Meta4                    | 4 | Other2                   | 5 |
| Other8                      | 3 | Other6                      | 3 | Regression8                 | 5 | Bayesian4                | 3 | Other2                   | 4 | Other8                   | 4 | Bayesian2                | 3 | Meta5                    | 4 | Meta3                    | 5 |
| Bayesian1                   | 3 | Other7                      | 3 | Correlation2                | 5 | Bayesian5                | 3 | Other4                   | 4 | Meta3                    | 4 | Bayesian4                | 3 | Other2                   | 4 | Other8                   | 5 |
| Bayesian2                   | 3 | Other8                      | 3 | MutualInformation2          | 5 | Bayesian6                | 3 | Other5                   | 4 | Other7                   | 4 | Bayesian5                | 3 | Other5                   | 4 | Regression7              | 5 |
| Bayesian3                   | 3 | Bayesian6                   | 4 | Correlation3                | 5 | Meta5                    | 3 | Other7                   | 4 | Meta5                    | 4 | Meta1                    | 3 | Other6                   | 4 | Meta4                    | 5 |
| Bayesian6                   | 3 | Meta3                       | 4 | MutualInformation3          | 5 | Other2                   | 3 | Other8                   | 4 | Bayesian1                | 5 | Meta5                    | 3 | Other7                   | 4 | Other7                   | 5 |
| Other7                      | 3 | Other5                      | 4 | Regression6                 | 5 | Other5                   | 3 | Meta3                    | 4 | Bayesian2                | 5 | Other2                   | 3 | Regression2              | 4 | Other5                   | 5 |
| Meta5                       | 3 | Regression7                 | 4 | MutualInformation4          | 5 | Regression7              | 3 | Meta5                    | 4 | Regression3              | 5 | Regression2              | 3 | Regression7              | 4 | Meta5                    | 5 |

Figure 7: Clustering (PCA) of base methods for the DREAM5 datasets into 3, 4 and 5 views (clusters). The number (and the corresponding color) in a cell identifies the cluster to which a base method is assigned.

## Results with K-means clustering

| Measures                                                                                                                                    | Scoring Schemes |     |            |     |    |       |
|---------------------------------------------------------------------------------------------------------------------------------------------|-----------------|-----|------------|-----|----|-------|
|                                                                                                                                             | ARACNE          | AWE | AWE w/o TF | CLR | ID | MRNET |
| Dynamic Time Warping (Asymmetric constraint path)                                                                                           | 2               | 2   | 2          | 2   | 2  | 2     |
| Dynamic Time Warping (Symmetric constraint path 1)                                                                                          | 2               | 2   | 2          | 2   | 2  | 2     |
| Dynamic Time Warping (Symmetric constraint path 2)                                                                                          | 2               | 2   | 2          | 2   | 2  | 2     |
| Euclidian distance                                                                                                                          | 2               | 2   | 2          | 2   | 2  | 2     |
| Kendall correlation coefficient                                                                                                             | 3               | 2   | 2          | 2   | 3  | 2     |
| L10Norm distance                                                                                                                            | 2               | 2   | 2          | 2   | 2  | 2     |
| Manhattan distance                                                                                                                          | 2               | 2   | 2          | 2   | 2  | 2     |
| Mean between symbolic sequence similarity and MI on symbol vectors with Equal Frequency discretization through optimized maximum likelihood | 3               | 2   | 2          | 2   | 3  | 2     |
| Mean between symbolic sequence similarity and MI on symbol vectors with Equal Width discretization through optimized maximum likelihood     | 3               | 2   | 2          | 2   | 3  | 2     |
| MI - Equal Frequency discretization through optimized maximum likelihood                                                                    | 3               | 2   | 2          | 2   | 3  | 2     |
| MI - Equal Frequency discretization through optimized maximum likelihood over coarse-grained variables (Kolmogorov-Sinai entropy)           | 1               | 2   | 2          | 2   | 1  | 2     |
| MI - Equal Frequency discretization through shrinkage                                                                                       | 3               | 2   | 2          | 2   | 3  | 2     |
| MI - Equal Frequency discretization through shrinkage over coarse-grained variables (Kolmogorov-Sinai entropy)                              | 1               | 2   | 2          |     | 1  | 2     |
| MI - Equal Width discretization through optimized maximum likelihood                                                                        | 2               | 2   | 2          | 2   | 3  | 2     |
| MI - Equal Width discretization through optimized maximum likelihood over coarse-grained variables (Kolmogorov-Sinai entropy)               | 2               | 2   | 2          | 2   | 1  | 2     |
| MI - Equal Width discretization through shrinkage                                                                                           | 2               | 2   | 2          | 2   | 3  | 2     |
| MI - Equal Width discretization through shrinkage over coarse-grained variables (Kolmogorov-Sinai entropy)                                  | 1               | 2   | 2          |     | 1  | 2     |
| MI on symbol vectors with Equal Frequency discretization through optimized maximum likelihood                                               | 3               | 2   | 2          | 2   | 3  | 2     |
| MI on symbol vectors with Equal Width discretization through optimized maximum likelihood                                                   | 3               | 2   | 2          | 2   | 3  | 2     |
| Pearson correlation coefficient                                                                                                             | 2               | 2   | 2          | 2   | 2  | 2     |
| Qualitative distance measure                                                                                                                | 3               | 2   | 2          | 3   | 1  | 2     |
| Spearman correlation coefficient                                                                                                            | 3               | 2   | 2          | 2   | 3  | 2     |
| Symbol sequence similarity                                                                                                                  | 3               | 2   | 2          | 2   | 3  | 2     |

Figure 8: Clustering (K-means) of base methods into 3 views (clusters) for the SynTReN *E. coli* dataset with 100 nodes and noise level 0.0. Each base method is a combination of a distance measure and a scoring scheme (cf. Supplementary File 1). The number (and the corresponding color) in a cell identifies the cluster to which a base method is assigned. Empty cells indicate that the corresponding base method has not been associated with any cluster. This can happen if the base method returns no interactions.



| Measures                                                                                                                                    | Scoring Schemes |     |            |     |    |       |
|---------------------------------------------------------------------------------------------------------------------------------------------|-----------------|-----|------------|-----|----|-------|
|                                                                                                                                             | ARACNE          | AWE | AWE w/o TF | CLR | ID | MRNET |
| Dynamic Time Warping (Asymmetric constraint path)                                                                                           | 4               | 2   | 2          | 2   | 4  | 4     |
| Dynamic Time Warping (Symmetric constraint path 1)                                                                                          | 4               | 2   | 2          | 4   | 4  | 4     |
| Dynamic Time Warping (Symmetric constraint path 2)                                                                                          | 4               | 2   | 2          | 2   | 4  | 4     |
| Euclidian distance                                                                                                                          | 4               | 2   | 2          | 4   | 4  | 4     |
| Kendall correlation coefficient                                                                                                             | 3               | 2   | 2          | 2   | 3  | 2     |
| L10Norm distance                                                                                                                            | 4               | 2   | 2          | 2   | 4  | 4     |
| Manhattan distance                                                                                                                          | 4               | 2   | 2          | 4   | 4  | 4     |
| Mean between symbolic sequence similarity and MI on symbol vectors with Equal Frequency discretization through optimized maximum likelihood | 3               | 2   | 2          | 2   | 3  | 2     |
| Mean between symbolic sequence similarity and MI on symbol vectors with Equal Width discretization through optimized maximum likelihood     | 3               | 2   | 2          | 2   | 3  | 2     |
| MI - Equal Frequency discretization through optimized maximum likelihood                                                                    | 3               | 2   | 2          | 2   | 3  | 2     |
| MI - Equal Frequency discretization through optimized maximum likelihood over coarse-grained variables (Kolmogorov-Sinai entropy)           | 1               | 2   | 2          | 2   | 1  | 2     |
| MI - Equal Frequency discretization through shrinkage                                                                                       | 3               | 2   | 2          | 2   | 3  | 2     |
| MI - Equal Frequency discretization through shrinkage over coarse-grained variables (Kolmogorov-Sinai entropy)                              | 1               | 2   | 2          |     | 1  | 2     |
| MI - Equal Width discretization through optimized maximum likelihood                                                                        | 2               | 2   | 2          | 2   | 3  | 2     |
| MI - Equal Width discretization through optimized maximum likelihood over coarse-grained variables (Kolmogorov-Sinai entropy)               | 2               | 2   | 2          | 2   | 1  | 2     |
| MI - Equal Width discretization through shrinkage                                                                                           | 2               | 2   | 2          | 2   | 3  | 2     |
| MI - Equal Width discretization through shrinkage over coarse-grained variables (Kolmogorov-Sinai entropy)                                  | 1               | 2   | 2          |     | 1  | 2     |
| MI on symbol vectors with Equal Frequency discretization through optimized maximum likelihood                                               | 3               | 2   | 2          | 2   | 3  | 2     |
| MI on symbol vectors with Equal Width discretization through optimized maximum likelihood                                                   | 3               | 2   | 2          | 2   | 3  | 2     |
| Pearson correlation coefficient                                                                                                             | 2               | 2   | 2          | 2   | 2  | 2     |
| Qualitative distance measure                                                                                                                | 3               | 2   | 2          | 3   | 1  | 2     |
| Spearman correlation coefficient                                                                                                            | 3               | 2   | 2          | 2   | 3  | 2     |
| Symbol sequence similarity                                                                                                                  | 3               | 2   | 2          | 2   | 3  | 2     |

Figure 9: Clustering (K-means) of base methods into 4 views (clusters) for the SynTReN *E. coli* dataset with 100 nodes and noise level 0.0. Each base method is a combination of a distance measure and a scoring scheme (cf. Supplementary File 1). The number (and the corresponding color) in a cell identifies the cluster to which a base method is assigned. Empty cells indicate that the corresponding base method has not been associated with any cluster. This can happen if the base method returns no interactions.

| Measures                                                                                                                                    | Scoring Schemes |     |            |     |    |       |
|---------------------------------------------------------------------------------------------------------------------------------------------|-----------------|-----|------------|-----|----|-------|
|                                                                                                                                             | ARACNE          | AWE | AWE w/o TF | CLR | ID | MRNET |
| Dynamic Time Warping (Asymmetric constraint path)                                                                                           | 4               | 2   | 2          | 2   | 4  | 4     |
| Dynamic Time Warping (Symmetric constraint path 1)                                                                                          | 4               | 2   | 2          | 2   | 4  | 4     |
| Dynamic Time Warping (Symmetric constraint path 2)                                                                                          | 4               | 2   | 2          | 2   | 4  | 4     |
| Euclidian distance                                                                                                                          | 4               | 2   | 2          | 4   | 4  | 4     |
| Kendall correlation coefficient                                                                                                             | 5               | 2   | 2          | 2   | 5  | 3     |
| L10Norm distance                                                                                                                            | 4               | 2   | 2          | 2   | 4  | 4     |
| Manhattan distance                                                                                                                          | 4               | 2   | 2          | 4   | 4  | 4     |
| Mean between symbolic sequence similarity and MI on symbol vectors with Equal Frequency discretization through optimized maximum likelihood | 5               | 2   | 2          | 2   | 5  | 3     |
| Mean between symbolic sequence similarity and MI on symbol vectors with Equal Width discretization through optimized maximum likelihood     | 5               | 2   | 2          | 2   | 5  | 3     |
| MI - Equal Frequency discretization through optimized maximum likelihood                                                                    | 5               | 2   | 2          | 2   | 5  | 3     |
| MI - Equal Frequency discretization through optimized maximum likelihood over coarse-grained variables (Kolmogorov-Sinai entropy)           | 1               | 2   | 2          | 2   | 1  | 2     |
| MI - Equal Frequency discretization through shrinkage                                                                                       | 5               | 2   | 2          | 2   | 5  | 3     |
| MI - Equal Frequency discretization through shrinkage over coarse-grained variables (Kolmogorov-Sinai entropy)                              | 1               | 2   | 2          |     | 1  | 2     |
| MI - Equal Width discretization through optimized maximum likelihood                                                                        | 3               | 2   | 2          | 2   | 3  | 2     |
| MI - Equal Width discretization through optimized maximum likelihood over coarse-grained variables (Kolmogorov-Sinai entropy)               | 2               | 2   | 2          | 2   | 1  | 2     |
| MI - Equal Width discretization through shrinkage                                                                                           | 3               | 2   | 2          | 2   | 3  | 2     |
| MI - Equal Width discretization through shrinkage over coarse-grained variables (Kolmogorov-Sinai entropy)                                  | 1               | 2   | 2          |     | 1  | 2     |
| MI on symbol vectors with Equal Frequency discretization through optimized maximum likelihood                                               | 5               | 2   | 2          | 2   | 5  | 3     |
| MI on symbol vectors with Equal Width discretization through optimized maximum likelihood                                                   | 5               | 2   | 2          | 2   | 5  | 3     |
| Pearson correlation coefficient                                                                                                             | 2               | 2   | 2          | 2   | 3  | 2     |
| Qualitative distance measure                                                                                                                | 5               | 2   | 2          | 5   | 1  | 3     |
| Spearman correlation coefficient                                                                                                            | 5               | 2   | 2          | 2   | 5  | 3     |
| Symbol sequence similarity                                                                                                                  | 5               | 2   | 2          | 2   | 5  | 3     |

Figure 10: Clustering (K-means) of base methods into 5 views (clusters) for the SynTReN *E. coli* dataset with 100 nodes and noise level 0.0. Each base method is a combination of a distance measure and a scoring scheme (cf. Supplementary File 1). The number (and the corresponding color) in a cell identifies the cluster to which a base method is assigned. Empty cells indicate that the corresponding base method has not been associated with any cluster. This can happen if the base method returns no interactions.

| Measures                                                                                                                                    | Scoring Schemes |     |            |     |    |       |
|---------------------------------------------------------------------------------------------------------------------------------------------|-----------------|-----|------------|-----|----|-------|
|                                                                                                                                             | ARACNE          | AWE | AWE w/o TF | CLR | ID | MRNET |
| Dynamic Time Warping (Asymmetric constraint path)                                                                                           | 2               | 2   | 2          | 2   | 2  | 2     |
| Dynamic Time Warping (Symmetric constraint path 1)                                                                                          | 2               | 2   | 2          | 2   | 2  | 2     |
| Dynamic Time Warping (Symmetric constraint path 2)                                                                                          | 2               | 2   | 2          | 2   | 2  | 2     |
| Euclidian distance                                                                                                                          | 2               | 2   | 2          | 2   | 2  | 2     |
| Kendall correlation coefficient                                                                                                             | 3               | 2   | 2          | 2   | 3  | 2     |
| L10Norm distance                                                                                                                            | 2               | 2   | 2          | 2   | 1  | 2     |
| Manhattan distance                                                                                                                          | 2               | 2   | 2          | 2   | 2  | 2     |
| Mean between symbolic sequence similarity and MI on symbol vectors with Equal Frequency discretization through optimized maximum likelihood | 3               | 2   | 2          | 2   | 3  | 2     |
| Mean between symbolic sequence similarity and MI on symbol vectors with Equal Width discretization through optimized maximum likelihood     | 3               | 2   | 2          | 2   | 3  | 2     |
| MI - Equal Frequency discretization through optimized maximum likelihood                                                                    | 3               | 2   | 2          | 2   | 3  | 2     |
| MI - Equal Frequency discretization through optimized maximum likelihood over coarse-grained variables (Kolmogorov-Sinai entropy)           | 1               | 2   | 2          | 2   | 1  | 2     |
| MI - Equal Frequency discretization through shrinkage                                                                                       | 3               | 2   | 2          | 2   | 3  | 2     |
| MI - Equal Frequency discretization through shrinkage over coarse-grained variables (Kolmogorov-Sinai entropy)                              | 1               | 2   | 2          |     | 1  | 2     |
| MI - Equal Width discretization through optimized maximum likelihood                                                                        | 2               | 2   | 2          | 2   | 3  | 2     |
| MI - Equal Width discretization through optimized maximum likelihood over coarse-grained variables (Kolmogorov-Sinai entropy)               | 2               | 2   | 2          | 2   | 1  | 2     |
| MI - Equal Width discretization through shrinkage                                                                                           | 2               | 2   | 2          | 2   | 3  | 2     |
| MI - Equal Width discretization through shrinkage over coarse-grained variables (Kolmogorov-Sinai entropy)                                  | 1               | 2   | 2          |     | 1  | 2     |
| MI on symbol vectors with Equal Frequency discretization through optimized maximum likelihood                                               | 3               | 2   | 2          | 2   | 3  | 2     |
| MI on symbol vectors with Equal Width discretization through optimized maximum likelihood                                                   | 3               | 2   | 2          | 2   | 3  | 2     |
| Pearson correlation coefficient                                                                                                             | 2               | 2   | 2          | 2   | 2  | 2     |
| Qualitative distance measure                                                                                                                | 3               | 2   | 2          | 3   | 1  | 2     |
| Spearman correlation coefficient                                                                                                            | 3               | 2   | 2          | 2   | 3  | 2     |
| Symbol sequence similarity                                                                                                                  | 3               | 2   | 2          | 2   | 3  | 2     |

Figure 11: Clustering (K-means) of base methods into 3 views (clusters) for the SynTReN *Yeast* dataset with 100 nodes and noise level 0.0. Each base method is a combination of a distance measure and a scoring scheme (cf. Supplementary File 1). The number (and the corresponding color) in a cell identifies the cluster to which a base method is assigned. Empty cells indicate that the corresponding base method has not been associated with any cluster. This can happen if the base method returns no interactions.

| Measures                                                                                                                                    | Scoring Schemes |     |            |     |    |       |
|---------------------------------------------------------------------------------------------------------------------------------------------|-----------------|-----|------------|-----|----|-------|
|                                                                                                                                             | ARACNE          | AWE | AWE w/o TF | CLR | ID | MRNET |
| Dynamic Time Warping (Asymmetric constraint path)                                                                                           | 4               | 2   | 2          | 2   | 4  | 4     |
| Dynamic Time Warping (Symmetric constraint path 1)                                                                                          | 4               | 2   | 2          | 4   | 4  | 4     |
| Dynamic Time Warping (Symmetric constraint path 2)                                                                                          | 4               | 2   | 2          | 4   | 4  | 4     |
| Euclidian distance                                                                                                                          | 4               | 2   | 2          | 4   | 4  | 4     |
| Kendall correlation coefficient                                                                                                             | 3               | 2   | 2          | 2   | 3  | 2     |
| L10Norm distance                                                                                                                            | 4               | 2   | 2          | 4   | 4  | 4     |
| Manhattan distance                                                                                                                          | 4               | 2   | 2          | 4   | 4  | 4     |
| Mean between symbolic sequence similarity and MI on symbol vectors with Equal Frequency discretization through optimized maximum likelihood | 3               | 2   | 2          | 2   | 3  | 2     |
| Mean between symbolic sequence similarity and MI on symbol vectors with Equal Width discretization through optimized maximum likelihood     | 3               | 2   | 2          | 2   | 3  | 2     |
| MI - Equal Frequency discretization through optimized maximum likelihood                                                                    | 3               | 2   | 2          | 2   | 3  | 2     |
| MI - Equal Frequency discretization through optimized maximum likelihood over coarse-grained variables (Kolmogorov-Sinai entropy)           | 1               | 2   | 2          | 2   | 1  | 2     |
| MI - Equal Frequency discretization through shrinkage                                                                                       | 3               | 2   | 2          | 2   | 3  | 2     |
| MI - Equal Frequency discretization through shrinkage over coarse-grained variables (Kolmogorov-Sinai entropy)                              | 1               | 2   | 2          |     | 1  | 2     |
| MI - Equal Width discretization through optimized maximum likelihood                                                                        | 2               | 2   | 2          | 2   | 3  | 2     |
| MI - Equal Width discretization through optimized maximum likelihood over coarse-grained variables (Kolmogorov-Sinai entropy)               | 2               | 2   | 2          | 2   | 1  | 2     |
| MI - Equal Width discretization through shrinkage                                                                                           | 2               | 2   | 2          | 2   | 3  | 2     |
| MI - Equal Width discretization through shrinkage over coarse-grained variables (Kolmogorov-Sinai entropy)                                  | 1               | 2   | 2          |     | 1  | 2     |
| MI on symbol vectors with Equal Frequency discretization through optimized maximum likelihood                                               | 3               | 2   | 2          | 2   | 3  | 2     |
| MI on symbol vectors with Equal Width discretization through optimized maximum likelihood                                                   | 3               | 2   | 2          | 2   | 3  | 2     |
| Pearson correlation coefficient                                                                                                             | 2               | 2   | 2          | 2   | 2  | 2     |
| Qualitative distance measure                                                                                                                | 3               | 2   | 2          | 3   | 1  | 2     |
| Spearman correlation coefficient                                                                                                            | 3               | 2   | 2          | 2   | 3  | 2     |
| Symbol sequence similarity                                                                                                                  | 3               | 2   | 2          | 2   | 3  | 2     |

Figure 12: Clustering (K-means) of base methods into 4 views (clusters) for the SynTReN *Yeast* dataset with 100 nodes and noise level 0.0. Each base method is a combination of a distance measure and a scoring scheme (cf. Supplementary File 1). The number (and the corresponding color) in a cell identifies the cluster to which a base method is assigned. Empty cells indicate that the corresponding base method has not been associated with any cluster. This can happen if the base method returns no interactions.

| Measures                                                                                                                                    | Scoring Schemes |     |            |     |    |       |
|---------------------------------------------------------------------------------------------------------------------------------------------|-----------------|-----|------------|-----|----|-------|
|                                                                                                                                             | ARACNE          | AWE | AWE w/o TF | CLR | ID | MRNET |
| Dynamic Time Warping (Asymmetric constraint path)                                                                                           | 4               | 2   | 2          | 2   | 4  | 4     |
| Dynamic Time Warping (Symmetric constraint path 1)                                                                                          | 4               | 2   | 2          | 4   | 4  | 4     |
| Dynamic Time Warping (Symmetric constraint path 2)                                                                                          | 4               | 2   | 2          | 4   | 4  | 4     |
| Euclidian distance                                                                                                                          | 4               | 2   | 2          | 4   | 4  | 4     |
| Kendall correlation coefficient                                                                                                             | 5               | 2   | 2          | 2   | 5  | 3     |
| L10Norm distance                                                                                                                            | 4               | 2   | 2          | 4   | 4  | 4     |
| Manhattan distance                                                                                                                          | 4               | 2   | 2          | 4   | 4  | 4     |
| Mean between symbolic sequence similarity and MI on symbol vectors with Equal Frequency discretization through optimized maximum likelihood | 5               | 2   | 2          | 2   | 5  | 3     |
| Mean between symbolic sequence similarity and MI on symbol vectors with Equal Width discretization through optimized maximum likelihood     | 5               | 2   | 2          | 2   | 5  | 3     |
| MI - Equal Frequency discretization through optimized maximum likelihood                                                                    | 5               | 2   | 2          | 2   | 5  | 3     |
| MI - Equal Frequency discretization through optimized maximum likelihood over coarse-grained variables (Kolmogorov-Sinai entropy)           | 1               | 2   | 2          | 2   | 1  | 2     |
| MI - Equal Frequency discretization through shrinkage                                                                                       | 5               | 2   | 2          | 2   | 5  | 3     |
| MI - Equal Frequency discretization through shrinkage over coarse-grained variables (Kolmogorov-Sinai entropy)                              | 1               | 2   | 2          |     | 1  | 2     |
| MI - Equal Width discretization through optimized maximum likelihood                                                                        | 2               | 2   | 2          | 2   | 5  | 2     |
| MI - Equal Width discretization through optimized maximum likelihood over coarse-grained variables (Kolmogorov-Sinai entropy)               | 2               | 2   | 2          | 2   | 1  | 2     |
| MI - Equal Width discretization through shrinkage                                                                                           | 2               | 2   | 2          | 2   | 5  | 2     |
| MI - Equal Width discretization through shrinkage over coarse-grained variables (Kolmogorov-Sinai entropy)                                  | 1               | 2   | 2          |     | 1  | 2     |
| MI on symbol vectors with Equal Frequency discretization through optimized maximum likelihood                                               | 5               | 2   | 2          | 2   | 5  | 3     |
| MI on symbol vectors with Equal Width discretization through optimized maximum likelihood                                                   | 5               | 2   | 2          | 2   | 5  | 3     |
| Pearson correlation coefficient                                                                                                             | 2               | 2   | 2          | 2   | 2  | 2     |
| Qualitative distance measure                                                                                                                | 5               | 2   | 2          | 5   | 1  | 3     |
| Spearman correlation coefficient                                                                                                            | 5               | 2   | 2          | 2   | 5  | 3     |
| Symbol sequence similarity                                                                                                                  | 5               | 2   | 2          | 2   | 5  | 3     |

Figure 13: Clustering (K-means) of base methods into 5 views (clusters) for the SynTReN *Yeast* dataset with 100 nodes and noise level 0.0. Each base method is a combination of a distance measure and a scoring scheme (cf. Supplementary File 1). The number (and the corresponding color) in a cell identifies the cluster to which a base method is assigned. Empty cells indicate that the corresponding base method has not been associated with any cluster. This can happen if the base method returns no interactions.

| D5InSilico - 3 Views |   | D5InSilico - 4 Views |   | D5InSilico - 5 Views |   | D5EColi - 3 Views  |   | D5EColi - 4 Views  |   | D5EColi - 5 Views  |   | D5Yeast - 3 Views  |   | D5Yeast - 4 Views  |   | D5Yeast - 5 Views  |   |         |  |
|----------------------|---|----------------------|---|----------------------|---|--------------------|---|--------------------|---|--------------------|---|--------------------|---|--------------------|---|--------------------|---|---------|--|
| Methods              |   | Methods              |   | Methods              |   | Methods            |   | Methods            |   | Methods            |   | Methods            |   | Methods            |   | Methods            |   | Methods |  |
| Other5               | 1 | Other5               | 1 | Other5               | 1 | Other2             | 1 | Other2             | 1 | Other2             | 1 | Regression2        | 1 | Regression2        | 1 | Regression2        | 1 |         |  |
| Other2               | 1 | Other2               | 1 | Other2               | 1 | Other5             | 1 | Other5             | 1 | Other5             | 1 | Other2             | 1 | Other2             | 1 | Other2             | 1 |         |  |
| Regression7          | 1 | Regression7          | 1 | Regression7          | 1 | Other6             | 2 | Other6             | 2 | Other6             | 2 | Meta3              | 1 | Meta3              | 1 | Meta3              | 1 |         |  |
| Meta2                | 2 | Meta2                | 2 | Other6               | 2 | Other3             | 3 | Other3             | 3 | Other3             | 3 | Other6             | 2 | Other6             | 2 | Other6             | 2 |         |  |
| Regression8          | 2 | Correlation2         | 2 | Meta2                | 3 | Other4             | 3 | Other4             | 3 | Other4             | 3 | Other8             | 3 | Other8             | 3 | Other8             | 3 |         |  |
| Meta4                | 2 | Correlation1         | 2 | Other8               | 3 | MutualInformation5 | 3 | MutualInformation5 | 3 | MutualInformation5 | 3 | Meta1              | 3 | Meta1              | 3 | Meta1              | 3 |         |  |
| Other4               | 2 | Meta4                | 2 | Other7               | 3 | Other8             | 3 | Other8             | 3 | Other8             | 3 | Meta2              | 3 | Meta2              | 3 | Meta2              | 3 |         |  |
| Regression4          | 2 | Other4               | 2 | Regression8          | 3 | Correlation1       | 3 | Correlation1       | 3 | Correlation1       | 3 | Regression1        | 3 | Regression1        | 3 | Regression1        | 3 |         |  |
| MutualInformation3   | 2 | Regression4          | 2 | Meta4                | 3 | Meta3              | 3 | Meta3              | 3 | Meta3              | 3 | Regression4        | 3 | Regression4        | 3 | Regression3        | 3 |         |  |
| Regression5          | 2 | Correlation3         | 2 | Other4               | 3 | Bayesian6          | 3 | Bayesian6          | 3 | Bayesian6          | 3 | Regression3        | 3 | Regression3        | 3 | Regression8        | 3 |         |  |
| Meta5                | 2 | Bayesian6            | 3 | Regression4          | 3 | MutualInformation2 | 3 | MutualInformation2 | 3 | MutualInformation2 | 3 | Regression8        | 3 | Regression8        | 3 | Bayesian5          | 3 |         |  |
| Regression6          | 2 | Other8               | 3 | MutualInformation3   | 3 | Meta4              | 3 | Meta4              | 3 | Meta4              | 3 | Bayesian5          | 3 | Bayesian5          | 3 | Regression7        | 3 |         |  |
| MutualInformation4   | 2 | Bayesian5            | 3 | Regression5          | 3 | Other7             | 3 | Other7             | 3 | Other7             | 3 | Regression7        | 3 | Regression7        | 3 | Bayesian6          | 3 |         |  |
| Other6               | 2 | Meta3                | 3 | Regression6          | 3 | MutualInformation4 | 3 | MutualInformation4 | 3 | MutualInformation4 | 3 | Bayesian6          | 3 | Bayesian6          | 3 | Regression5        | 3 |         |  |
| Correlation2         | 2 | Other7               | 3 | MutualInformation4   | 3 | MutualInformation3 | 3 | MutualInformation3 | 3 | MutualInformation3 | 3 | Regression5        | 3 | Regression5        | 3 | Regression6        | 3 |         |  |
| MutualInformation2   | 2 | Bayesian4            | 3 | Bayesian6            | 3 | Meta5              | 3 | Bayesian1          | 3 | Bayesian1          | 3 | Regression6        | 3 | Regression6        | 3 | Bayesian1          | 3 |         |  |
| Correlation1         | 2 | MutualInformation1   | 3 | Correlation2         | 3 | Bayesian1          | 3 | Bayesian2          | 3 | Bayesian2          | 3 | Bayesian4          | 3 | Bayesian4          | 3 | Bayesian1          | 3 |         |  |
| Bayesian1            | 2 | MutualInformation5   | 3 | MutualInformation2   | 3 | Bayesian2          | 3 | Bayesian4          | 3 | Bayesian5          | 3 | Bayesian5          | 3 | Bayesian3          | 3 | Bayesian3          | 3 |         |  |
| Regression3          | 2 | Regression2          | 3 | Correlation1         | 3 | Bayesian4          | 3 | Bayesian5          | 3 | Bayesian2          | 3 | Bayesian2          | 3 | Bayesian2          | 3 | Bayesian2          | 3 |         |  |
| Other1               | 2 | Bayesian3            | 3 | Bayesian1            | 3 | Bayesian5          | 3 | Correlation2       | 3 | Correlation2       | 3 | Bayesian2          | 3 | Bayesian2          | 3 | Correlation3       | 3 |         |  |
| Correlation3         | 2 | Regression8          | 4 | Regression3          | 3 | Correlation2       | 3 | Regression1        | 3 | Regression1        | 3 | Correlation3       | 3 | Correlation3       | 3 | MutualInformation5 | 3 |         |  |
| Other3               | 2 | MutualInformation3   | 4 | Other1               | 3 | Regression1        | 3 | Bayesian3          | 3 | Bayesian3          | 3 | MutualInformation5 | 3 | MutualInformation5 | 3 | Other1             | 3 |         |  |
| Bayesian2            | 2 | Regression5          | 4 | Regression2          | 3 | Bayesian3          | 3 | Correlation3       | 3 | Correlation3       | 3 | Other1             | 3 | Other1             | 3 | MutualInformation4 | 3 |         |  |
| Regression1          | 2 | Meta5                | 4 | Correlation3         | 3 | Correlation3       | 3 | Regression5        | 3 | Regression5        | 3 | MutualInformation4 | 3 | MutualInformation4 | 3 | Correlation2       | 3 |         |  |
| Meta1                | 2 | Regression6          | 4 | Other3               | 3 | Regression5        | 3 | Regression4        | 3 | Regression2        | 3 | Correlation2       | 3 | Correlation2       | 3 | MutualInformation2 | 3 |         |  |
| Bayesian6            | 3 | MutualInformation4   | 4 | Bayesian2            | 3 | Regression4        | 3 | Regression2        | 3 | Regression7        | 3 | MutualInformation2 | 3 | MutualInformation2 | 3 | Correlation1       | 3 |         |  |
| Other8               | 3 | Other6               | 4 | Regression1          | 3 | Regression2        | 3 | Regression7        | 3 | Regression8        | 3 | Correlation1       | 3 | Correlation1       | 3 | Other4             | 3 |         |  |
| Bayesian5            | 3 | MutualInformation2   | 4 | Meta1                | 3 | Regression7        | 3 | Regression8        | 3 | Regression3        | 3 | Other4             | 3 | Other4             | 3 | MutualInformation1 | 3 |         |  |
| Meta3                | 3 | Bayesian1            | 4 | Meta5                | 4 | Regression8        | 3 | Regression3        | 3 | Regression6        | 3 | MutualInformation1 | 3 | MutualInformation1 | 3 | Other3             | 3 |         |  |
| Other7               | 3 | Regression3          | 4 | Bayesian5            | 5 | Regression3        | 3 | Regression6        | 3 | MutualInformation1 | 3 | Other3             | 3 | Other3             | 3 | Meta4              | 3 |         |  |
| Bayesian4            | 3 | Other1               | 4 | Meta3                | 5 | Regression6        | 3 | MutualInformation1 | 3 | Meta2              | 3 | Meta4              | 3 | Meta4              | 3 | Other7             | 3 |         |  |
| MutualInformation1   | 3 | Other3               | 4 | Bayesian4            | 5 | MutualInformation1 | 3 | Meta2              | 3 | Meta1              | 3 | Other7             | 3 | Other7             | 3 | Other5             | 3 |         |  |
| MutualInformation5   | 3 | Bayesian2            | 4 | MutualInformation1   | 5 | Meta2              | 3 | Meta1              | 3 | Other1             | 3 | Other5             | 3 | Other5             | 3 | MutualInformation3 | 3 |         |  |
| Regression2          | 3 | Regression1          | 4 | MutualInformation5   | 5 | Meta1              | 3 | Other1             | 3 | Meta5              | 4 | MutualInformation3 | 3 | MutualInformation3 | 3 | Meta5              | 4 |         |  |
| Bayesian3            | 3 | Meta1                | 4 | Bayesian3            | 5 | Other1             | 3 | Meta5              | 4 | Regression4        | 5 | Meta5              | 3 | Meta5              | 4 | Regression4        | 5 |         |  |

Figure 14: Clustering (K-means) of base methods for the DREAM5 datasets into 3, 4 and 5 views (clusters). The number (and the corresponding color) in a cell identifies the cluster to which a base method is assigned.
